# Supplementary material for: Application of Hybrid ARIMA and Artificial Neural Network Modelling for Electromagnetic Propagation: An Alternative to the Least Squares Method and ITU Recommendation P.1546-5 for Amazon Urbanized Cities
Source: Hindawi journal article supplement (doi:10.1155/2020/8494185), 2020-03-18
Supplement: f1 [file 8494185.f1.zip]

Archive with 4 entries (4 files):
- 8494185.f1/Intructions for .csv archives.txt
- 8494185.f1/radial_1_PSNR_POT_DIST.csv
- 8494185.f1/radial_2_PSNR_POT_DIST.csv
- 8494185.f1/radial_3_PSNR_POT_DIST.csv
