# Supplementary material for: Application of Hybrid ARIMA and Artificial Neural Network Modelling for Electromagnetic Propagation: An Alternative to the Least Squares Method and ITU Recommendation P.1546-5 for Amazon Urbanized Cities
Source: Hindawi journal article supplement (doi:10.1155/2020/8494185), 2020-03-18
Supplement: f1 [file 8494185.f1.zip › 8494185.f1/Intructions for .csv archives.txt]

Intructions for .csv archives

The columns of the .csv archives refers to the following properties of measured points:

1- Identification of the measured ponit;

2- PSNR value;

3- Received signal power intensity value (dBm);

4- Distante to Tx
