# Supplementary material for: Application of Hybrid ARIMA and Artificial Neural Network Modelling for Electromagnetic Propagation: An Alternative to the Least Squares Method and ITU Recommendation P.1546-5 for Amazon Urbanized Cities
Source: Hindawi journal article supplement (doi:10.1155/2020/8494185), 2020-03-18
Supplement: f1 [file 8494185.f1.zip › 8494185.f1/radial_1_PSNR_POT_DIST.csv]

3301	17.862	-45.386	0.610
3302	42.902	-45.665	1.13
201	25.088	-65.862	1.63
202	37.635	-62.638	2.22
203	44.482	-73.182	2.85
204	31.366	-55.565	3.55
205	34.611	-61.471	4.29
3303	36.148	-58.127	4.85
206	39.379	-50.137	5.46
