# Supplementary material for: Application of Hybrid ARIMA and Artificial Neural Network Modelling for Electromagnetic Propagation: An Alternative to the Least Squares Method and ITU Recommendation P.1546-5 for Amazon Urbanized Cities
Source: Hindawi journal article supplement (doi:10.1155/2020/8494185), 2020-03-18
Supplement: f1 [file 8494185.f1.zip › 8494185.f1/radial_2_PSNR_POT_DIST.csv]

3304	31.682	-57.865	0.63
3305	35.763	-54.976	1.01
501	35.963	-57.903	1.48
502	29.415	-68.037	2.02
3306	38.175	-60.206	2.61
503	44.180	-69.694	3.00
504	34.122	-71.642	3.61
505	26.627	-72.658	4.44
3307	40.556	-75.856	4.94
3308	26.825	-77.821	5.44
506	30.899	-78.432	5.93
508	36.363	-83.483	9.48
509	41.312	-95.334	10.99
510	17.846	-91.426	12.09
511	32.998	-84.980	12.84
512	28.869	-88.222	13.46
514	24.854	-97.891	14.95
