# Supplementary material for: Application of Hybrid ARIMA and Artificial Neural Network Modelling for Electromagnetic Propagation: An Alternative to the Least Squares Method and ITU Recommendation P.1546-5 for Amazon Urbanized Cities
Source: Hindawi journal article supplement (doi:10.1155/2020/8494185), 2020-03-18
Supplement: f1 [file 8494185.f1.zip › 8494185.f1/radial_3_PSNR_POT_DIST.csv]

3309	41.186	-43.362	0.54
3310	29.362	-49.250	1.15
3311	47.402	-53.237	1.68
801	23.279	-44.938	2.09
802	24.829	-56.093	2.86
3312	36.063	-60.918	3.32
803	29.549	-76.820	3.81
